# Supplementary material
Source: PubMed Central journal article supplement (PMC8054514)

## Online Supplement

Nelson, L. D., Barber, J. K., Temkin, N. R., Dams-O'Connor, K., Dikmen, S., Giacino, J. T., Kramer, M. D., Levin, H. S., McCrea, M. A., Whyte, J., Bodien, Y. G., Yue, J. K., Manley, G. T., and the TRACK-TBI Investigators. (2020). Validity of the Brief Test of Adult Cognition by Telephone (BTACT) in level 1 trauma center patients 6 months post-traumatic brain injury: A TRACK-TBI Study. *Journal of Neurotrauma*. doi: 10.1089/neu.2020.7295

**Supplemental Figure.** Recruitment and retention flow chart.

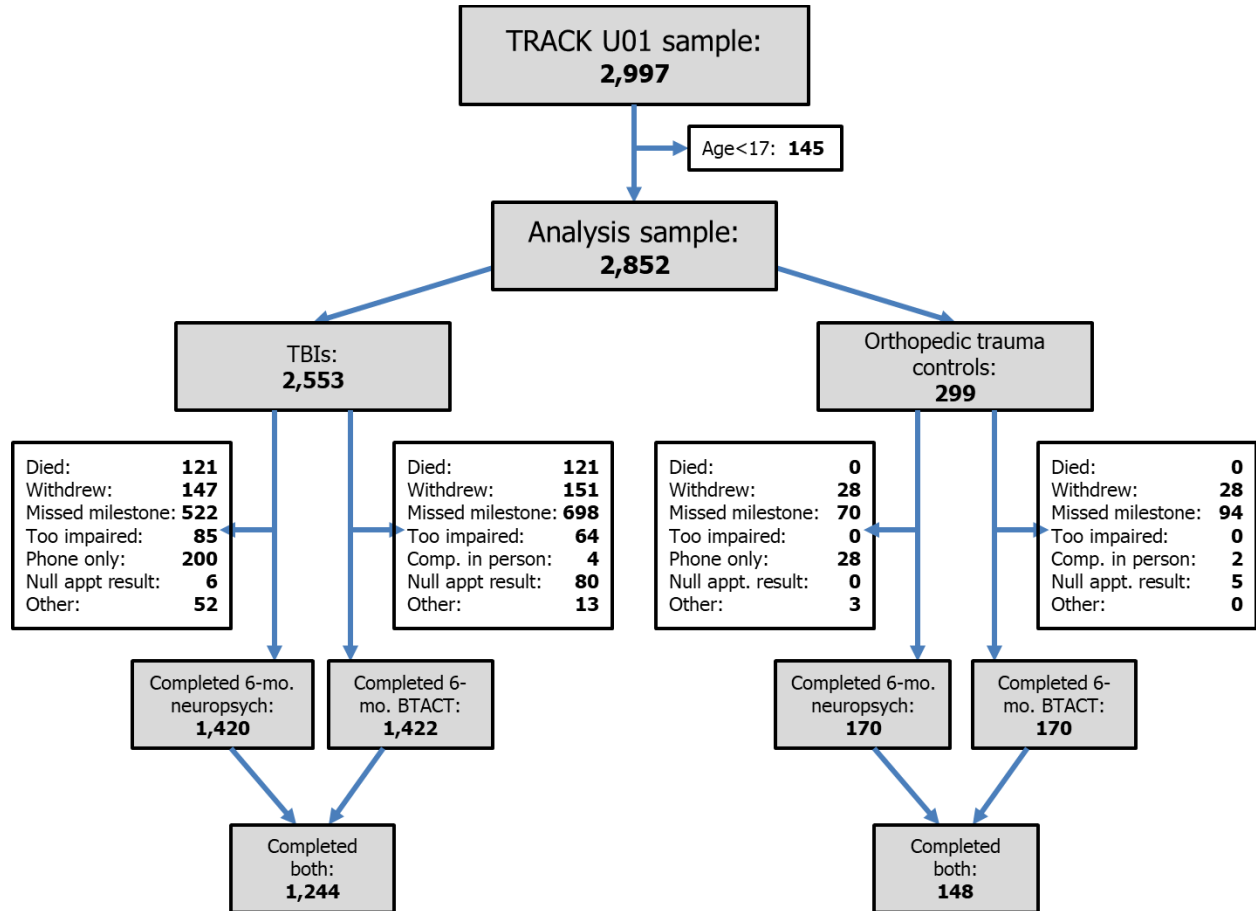

Supplement: Supp_FigS1.pdf [file Supp_FigS1.pdf]
